# Supplementary material
Source: PubMed Central journal article supplement (PMC6208157)

Supporting Information: Supporting Tables for Oxygen Three-Isotope Analysis

**Table S1. Instrumental biases of SIMS oxygen isotope analyses.**

| Relative bias on d18O                        |        | bias* | 2SD  | 2SE  | N |
|----------------------------------------------|--------|-------|------|------|---|
| <b>Standard</b>                              |        |       |      |      |   |
| San Carlos olivine                           | Fo 89  | =0.00 | 0.30 | 0.11 | 8 |
| HN 16                                        | Fo 100 | -0.01 | 0.38 | 0.19 | 4 |
| SP 79-11 En                                  | En 97  | -2.13 | 0.17 | 0.09 | 4 |
| 95AK-6                                       | Wo 50  | 0.14  | 0.17 | 0.08 | 5 |
| PL3                                          | An 95  | -2.43 | 0.50 | 0.21 | 6 |
| Sierra Leone                                 | An 60  | -3.69 | 0.46 | 0.17 | 7 |
| <b>Estimated bias* for NWA 7325 minerals</b> |        |       |      |      |   |
| Olivine                                      | Fo 98  | 0.00  |      | 0.22 |   |
| Pyroxene                                     | Wo 45  | -0.08 |      | 0.13 |   |
| Plagioclase                                  | An 90  | -2.61 |      | 0.36 |   |

Olivine (Fo100-Fo89)

bias\*=0

Pyroxene (Wo: 0-50)

bias\*=0.0454\*(Wo)-2.13

Plagioclase (An:60-95)

bias\*=0.036\*(An)-5.84

Table S2. Trace element analyses of standard and NWA 7325 plagioclase.

| Samples                                         | Elements<br>SIMS data | SiO2 %<br>28Si cps | Na2O %<br>23Na/28Si | Al2O3 %<br>27Al/28Si | CaO %<br>40Ca/28Si | Mg ppm<br>24Mg/28Si | K ppm<br>39K/28Si | Sc ppm<br>45Sc/28Si | Ti ppm<br>47Ti/28Si | Cr ppm<br>52Cr/28Si | Mn ppm<br>55Mn/28Si | Fe ppm<br>57Fe/28Si | Co ppm<br>59Co/28Si | Ni ppm<br>60Ni/28Si | Cu ppm<br>63Cu/28Si | Rb ppm<br>85Rb/28Si | Sr ppm<br>88Sr/28Si | Ba ppm<br>138Ba/28Si |
|-------------------------------------------------|-----------------------|--------------------|---------------------|----------------------|--------------------|---------------------|-------------------|---------------------|---------------------|---------------------|---------------------|---------------------|---------------------|---------------------|---------------------|---------------------|---------------------|----------------------|
| <b>Standard</b>                                 |                       |                    |                     |                      |                    |                     |                   |                     |                     |                     |                     |                     |                     |                     |                     |                     |                     |                      |
| NIST 610 (n=3)                                  | SIMS                  | 7.52E+06           | 4.99E+00            | 1.97E-01             | 1.79E+00           | 7.25E-03            | 2.43E-02          | 5.48E-03            | 2.82E-04            | 2.29E-03            | 2.25E-03            | 3.26E-05            | 7.33E-04            | 1.20E-04            | 1.87E-04            | 8.79E-03            | 4.67E-03            | 2.45E-03             |
|                                                 | 1SD % (*)             | 4.5                | 1.4                 | 1.4                  | 3.0                | 2.4                 | 4.2               | 2.1                 | 2.4                 | 3.0                 | 3.2                 | 2.5                 | 4.2                 | 4.7                 | 4.6                 | 4.4                 | 2.9                 | 3.1                  |
|                                                 | Concentrations        | 72.3               | 14.0                | 2.0                  | 11.4               | 465.3               | 466.0             | 441.1               | 434.0               | 405.0               | 433.3               | 457.1               | 405.0               | 443.9               | 430.3               | 431.1               | 497.4               | 424.1                |
| Synthetic glass IG                              | SIMS                  | 3.55E+06           | 3.79E-01            | 3.79E+00             | 3.95E+00           | 1.72E-02            | 6.57E-02          | 1.18E-05            | 1.18E-04            | 5.12E-05            | 3.14E-04            | 4.10E-04            | 1.77E-06            | 2.74E-07            | 3.10E-06            | 5.55E-06            | 5.55E-03            | 8.05E-05             |
|                                                 | 1SD %                 | 0.6                | 0.5                 | 0.4                  | 0.3                | 0.4                 | 0.7               | 1.9                 | 0.8                 | 0.9                 | 0.8                 | 9.9                 | 38.0                | 6.9                 | 4.6                 | 0.3                 | 1.8                 |                      |
|                                                 | Concentrations        | 45.8               | 1.2                 | 34.7                 | 17.7               | 946.7               | 0.7               | 155.8               | 69.7                | 5192.5              | 1.0                 | 1.0                 | 1.0                 | 1.0                 | 1.0                 | 451.0               | 13.0                |                      |
| Synthetic glass OG (n=2)                        | SIMS                  | 3.91E+06           | 9.91E-01            | 3.55E+00             | 3.55E+00           | 1.02E-02            | 6.98E-02          | 1.02E-05            | 9.74E-05            | 2.81E-05            | 3.32E-04            | 4.24E-04            | 1.07E-06            | 3.83E-07            | 2.95E-06            | 8.24E-06            | 4.96E-03            | 1.36E-04             |
|                                                 | 1SD % (*)             | 2.1                | 0.4                 | 1.3                  | 1.3                | 5.8                 | 0.4               | 0.5                 | 2.8                 | 1.4                 | 0.7                 | 11.0                | 3.2                 | 2.0                 | 3.1                 | 0.8                 | 2.9                 |                      |
|                                                 | Concentrations        | 46.8               | 1.8                 | 33.4                 | 16.7               | 578.9               | 0.7               | 125.9               | 77.4                | 5744.3              | 0.7                 | 0.7                 | 0.7                 | 0.7                 | 0.7                 | 430.0               | 25.0                |                      |
| Synthetic glass DG                              | SIMS                  | 3.92E+06           | 1.23E+00            | 3.33E+00             | 3.23E+00           | 9.14E-03            | 7.24E-02          | 1.66E-05            | 1.43E-04            | 1.53E-05            | 4.45E-04            | 4.24E-04            | 1.40E-06            | 1.62E-07            | 1.71E-06            | 1.68E-05            | 4.42E-03            | 2.07E-04             |
|                                                 | 1SD %                 | 0.3                | 0.3                 | 0.4                  | 0.4                | 0.6                 | 0.6               | 2.5                 | 0.8                 | 2.4                 | 0.8                 | 0.9                 | 8.0                 | 30.8                | 8.2                 | 3.7                 | 0.3                 |                      |
|                                                 | Concentrations        | 48.9               | 2.3                 | 32.5                 | 15.5               | 536.7               | 1.0               | 197.8               | 116.2               | 5860.9              | 1.1                 | 1.1                 | 1.1                 | 1.1                 | 1.1                 | 397.0               | 35.0                |                      |
| Plagioclase Lab1                                | SIMS                  | 7.23E+06           | 2.29E+00            | 2.99E+00             | 2.44E+00           | 1.11E-02            | 1.72E-01          | 1.20E-06            | 3.02E-04            | 6.63E-07            | 1.39E-04            | 1.80E-04            | 8.60E-07            | 1.22E-07            | 7.53E-07            | 1.23E-05            | 1.16E-02            | 8.61E-04             |
|                                                 | 1SD %                 | 0.5                | 0.4                 | 0.3                  | 0.3                | 0.2                 | 0.2               | 5.6                 | 0.6                 | 11.7                | 0.8                 | 0.9                 | 7.3                 | 21.2                | 6.8                 | 2.3                 | 0.3                 |                      |
|                                                 | Concentrations        | 53.3               | 4.4                 | 29.9                 | 12.0               | 651.2               | 2415.7            | 389.6               | 5.32E+03            | 2.82E+05            | 3.02E+05            | 1.14E+04            | 0.5                 | 0.5                 | 0.5                 | 965.0               | 124.0               |                      |
| Plagioclase Hachijo-jima                        | SIMS                  | 4.73E+06           | 2.95E-01            | 4.28E+00             | 4.70E+00           | 9.55E-03            | 1.22E-03          | 2.78E-06            | 2.88E-05            | 1.16E-06            | 1.60E-04            | 3.20E-04            | 8.59E-07            | 6.06E-08            | 1.53E-07            | 1.95E-06            | 3.40E-03            | 2.50E-05             |
|                                                 | 1SD %                 | 0.5                | 0.6                 | 0.4                  | 0.4                | 0.4                 | 0.9               | 6.0                 | 1.2                 | 11.8                | 0.8                 | 1.2                 | 8.9                 | 47.3                | 27.6                | 10.6                | 0.2                 |                      |
|                                                 | Concentrations        | 43.8               | 0.42                | 36.2                 | 19.2               | 9.36E+02            | 36.0              | 2.85E+04            | 3614.5              | 2.58E+05            | 3943                | 0.42                | 0.20                | 0.31                | 0.06                | 1.76E+03            | 261                 |                      |
| Plagioclase Miyake-jima                         | SIMS                  | 3.37E+06           | 3.73E-01            | 4.06E+00             | 4.36E+00           | 1.09E-02            | 2.53E-03          | 3.12E-06            | 3.73E-05            | 2.69E-06            | 1.50E-04            | 3.45E-04            | 7.01E-07            | 1.26E-07            | 1.27E-06            | 2.20E-06            | 4.20E-03            | 5.29E-05             |
|                                                 | 1SD %                 | 0.4                | 0.5                 | 0.4                  | 0.3                | 0.3                 | 0.3               | 2.8                 | 1.7                 | 8.3                 | 1.2                 | 0.5                 | 11.2                | 47.2                | 10.4                | 6.6                 | 0.2                 |                      |
|                                                 | Concentrations        | 43.9               | 0.59                | 35.0                 | 19.4               | 567                 | 29                | 0.18                | 45                  | 0.42                | 25                  | 4269                | 0.34                | 0.41                | 2.6                 | 0.07                | 324                 |                      |
| Plagioclase RSF                                 | Average               | 3.59E-02           | 1.96E-01            | 9.64E-02             | 1.18E+03           | 2.63E+02            | 1.33E+03          | 2.75E+04            | 5.12E+05            | 2.82E+05            | 1.32E+04            | 6.8                 | 17.3                | 1.76E+03            | 3.40E+03            | 6.5                 | 14.9                |                      |
|                                                 | 1SD % (*)             | 6.6                | 2.9                 | 3.5                  | 4.4                | 6.8                 | 8.8               | 8.8                 | 8.8                 | 8.8                 | 8.8                 | 8.8                 | 8.8                 | 8.8                 | 8.8                 | 8.8                 | 8.8                 |                      |
|                                                 | Assigned RSF(*)       | 0.92               | 1.40                | 1.10                 | 1.33               | 0.95                | 1.20              | 1.29                | (1.45)              | (1.45)              | 1.45                | (1.45)              | (1.45)              | (1.45)              | (1.45)              | (1.00)              | 1.19                |                      |
| <b>NWA 7325 plagioclase (assuming SiO2=45%)</b> |                       |                    |                     |                      |                    |                     |                   |                     |                     |                     |                     |                     |                     |                     |                     |                     |                     |                      |
| An-1-1                                          | SIMS                  | 3.69E+06           | 6.43E-01            | 3.67E+00             | 3.91E+00           | 2.82E-02            | 2.51E-03          | 7.45E-06            | 1.30E-05            | 4.94E-05            | 8.46E-05            | 1.43E-05            | 2.29E-07            | 2.29E-08            | 6.85E-08            | 5.25E-06            | 4.08E-03            | 2.20E-06             |
|                                                 | 1SD %                 | 0.4                | 0.5                 | 0.7                  | 2.3                | 0.9                 | 8.3               | 7.2                 | 9.8                 | 6.5                 | 4.8                 | 33.0                | 65.5                | 49.1                | 9.6                 | 0.4                 | 7.5                 |                      |
|                                                 | Concentrations        | 45                 | 1.04                | 32.4                 | 17.0               | 1498                | 30                | 0.45                | 16.1                | 7.9                 | 14.7                | 181                 | 0.11                | 0.08                | 0.14                | 0.160               | 323                 |                      |
| An-1-3                                          | SIMS                  | 3.85E+06           | 6.21E-01            | 3.77E+00             | 3.94E+00           | 2.28E-02            | 2.06E-03          | 3.98E-06            | 9.51E-06            | 1.96E-05            | 4.28E-05            | 9.63E-06            | 1.32E-07            | 7.62E-08            | DL                  | 2.24E-06            | 4.07E-03            | 1.80E-06             |
|                                                 | 1SD %                 | 0.4                | 0.5                 | 0.5                  | 0.3                | 0.5                 | 6.8               | 3.7                 | 5.4                 | 1.1                 | 2.2                 | 28.0                | 33.6                | 6.1                 | 0.2                 | 5.3                 |                     |                      |
|                                                 | Concentrations        | 45                 | 1.00                | 33.3                 | 17.1               | 1211                | 24                | 0.24                | 11.8                | 3.1                 | 7.4                 | 122                 | 0.07                | 0.25                | 0.068               | 322                 |                     |                      |
| An-2-1                                          | SIMS                  | 3.63E+06           | 6.51E-01            | 3.78E+00             | 3.95E+00           | 2.60E-02            | 2.20E-03          | 3.24E-06            | 7.67E-06            | 3.50E-05            | 4.09E-05            | 1.37E-05            | 3.14E-07            | 5.81E-08            | 1.05E-07            | 2.33E-06            | 4.03E-03            | 2.56E-06             |
|                                                 | 1SD %                 | 0.3                | 0.4                 | 0.6                  | 0.3                | 0.4                 | 6.3               | 4.9                 | 2.8                 | 1.9                 | 3.4                 | 18.4                | 29.3                | 20.0                | 8.2                 | 0.3                 |                     |                      |
|                                                 | Concentrations        | 45                 | 1.05                | 33.4                 | 17.1               | 1381                | 26                | 0.19                | 9.5                 | 5.6                 | 7.1                 | 174                 | 0.16                | 0.19                | 0.22                | 0.071               | 318                 |                      |
| An-4-1                                          | SIMS                  | 3.73E+06           | 6.35E-01            | 3.79E+00             | 3.95E+00           | 2.58E-02            | 1.99E-03          | 3.47E-06            | 8.35E-06            | 3.42E-05            | 4.66E-05            | 1.48E-05            | 3.40E-07            | 6.81E-08            | 7.89E-08            | 1.70E-06            | 4.08E-03            | 1.44E-06             |
|                                                 | 1SD %                 | 0.4                | 0.6                 | 0.4                  | 0.4                | 0.3                 | 5.0               | 3.8                 | 7.1                 | 1.5                 | 2.7                 | 14.2                | 41.9                | 39.7                | 8.4                 | 0.2                 |                     |                      |
|                                                 | Concentrations        | 45                 | 1.02                | 33.4                 | 17.1               | 1368                | 24                | 0.21                | 10.3                | 5.5                 | 8.1                 | 187                 | 0.17                | 0.23                | 0.16                | 0.052               | 323                 |                      |
| An-4-2                                          | SIMS                  | 3.84E+06           | 6.64E-01            | 3.63E+00             | 3.86E+00           | 3.46E-02            | 2.82E-03          | 9.00E-06            | 1.23E-05            | 8.86E-05            | 8.21E-05            | 2.54E-05            | 2.52E-07            | 2.19E-08            | 1.43E-07            | 6.69E-06            | 4.02E-03            | 1.77E-06             |
|                                                 | 1SD %                 | 0.5                | 0.3                 | 0.6                  | 0.7                | 1.8                 | 2.9               | 3.6                 | 2.8                 | 2.5                 | 1.8                 | 26.6                | 65.5                | 23.2                | 6.4                 | 0.4                 |                     |                      |
|                                                 | Concentrations        | 45                 | 1.07                | 32.1                 | 16.8               | 1836                | 33                | 0.54                | 15.3                | 14.1                | 14.3                | 322                 | 0.13                | 0.07                | 0.30                | 0.204               | 318                 |                      |
| An-7-1                                          | SIMS                  | 3.77E+06           | 6.42E-01            | 3.75E+00             | 3.91E+00           | 2.44E-02            | 2.11E-03          | 2.69E-06            | 6.19E-06            | 2.58E-05            | 4.29E-05            | 1.18E-05            | 2.35E-07            | 2.24E-08            | 4.46E-08            | 1.58E-06            | 4.05E-03            | 1.15E-06             |
|                                                 | 1SD %                 | 0.5                | 0.5                 | 0.4                  | 0.4                | 0.4                 | 8.0               | 2.6                 | 11.6                | 2.5                 | 2.7                 | 27.0                | 65.5                | 53.4                | 6.0                 | 0.4                 |                     |                      |
|                                                 | Concentrations        | 45                 | 1.04                | 33.2                 | 17.0               | 1295                | 25                | 0.16                | 7.7                 | 4.1                 | 7.5                 | 150                 | 0.12                | 0.07                | 0.09                | 0.048               | 320                 |                      |
| An-7-2                                          | SIMS                  | 3.81E+06           | 6.25E-01            | 3.72E+00             | 3.88E+00           | 2.48E-02            | 1.80E-03          | 3.28E-06            | 8.17E-06            | 2.69E-05            | 3.94E-05            | 1.16E-05            | 2.20E-07            | 5.52E-08            | 4.43E-08            | 1.34E-06            | 4.09E-03            | 1.08E-06             |
|                                                 | 1SD %                 | 0.4                | 0.6                 | 0.4                  | 0.5                | 0.4                 | 5.9               | 4.3                 | 4.3                 | 2.0                 | 2.9                 | 51.8                | 37.8                | 9.1                 | 0.4                 | 10.9                |                     |                      |
|                                                 | Concentrations        | 45                 | 1.01                | 32.9                 | 16.8               | 1317                | 21                | 0.20                | 10.1                | 4.3                 | 6.8                 | 147                 | 0.11                | 0.18                | 0.09                | 0.041               | 323                 |                      |
| <b>Average (n=7)</b>                            |                       | 1.03               | 33.0                | 17.0                 | 1415               | 26                  | 0.28              | 11.5                | 6.4                 | 9.4                 | 183                 | 0.12                | 0.15                | 0.17                | 0.092               | 321                 |                     |                      |
| <b>1SD (%)</b>                                  |                       | 2.3                | 1.6                 | 0.9                  | 15                 | 16                  | 52                | 27                  | 59                  | 37                  | 36                  | 28                  | 51                  | 47                  | 69                  | 0.6                 | 32                  |                      |
| <b>Rejected data</b>                            |                       |                    |                     |                      |                    |                     |                   |                     |                     |                     |                     |                     |                     |                     |                     |                     |                     |                      |
| An-1-2                                          | SIMS                  | 3.37E+06           | 7.98E-01            | 4.79E+00             | 3.85E+00           | 6.59E-02            | 2.53E-03          | 2.94E-06            | 1.11E-05            | 7.57E-04            | 1.05E-04            | 3.39E-05            | 1.20E-06            | 8.70E-08            | 3.83E-08            | 1.84E-06            | 3.68E-03            | 1.77E-06             |
|                                                 | 1SD %                 | 1.0                | 0.8                 | 0.5                  | 1.9                | 1.2                 | 3.5               | 3.7                 | 1.5                 | 2.4                 | 2.4                 | 6.4                 | 25.6                | 69.9                | 12.9                | 0.3                 |                     |                      |
|                                                 | Concentrations        | 45                 | 1.29                | 42.3                 | 16.7               | 3500                | 30                | 0.18                | 13.7                | 120.8               | 18.3                | 429                 | 0.60                | 0.29                | 0.08                | 0.056               | 291                 |                      |
| An-2-2                                          | SIMS                  | 3.10E+06           | 7.70E-01            | 5.71E+00             | 3.87E+00           | 6.12E-02            | 2.52E-03          | 3.38E-06            | 1.01E-05            | 6.86E-04            | 6.42E-05            | 2.70E-05            | 1.26E-06            | 9.52E-08            | 9.57E-08            | 2.03E-06            | 3.77E-03            | 1.68E-06             |
|                                                 | 1SD %                 | 0.8                | 0.7                 | 0.5                  | 1.7                | 0.6                 | 3.3               | 4.2                 | 1.6                 | 2.2                 | 2.0                 | 13.6                | 54.7                | 33.6                | 7.2                 | 0.4                 |                     |                      |
|                                                 | Concentrations        | 45                 | 1.24                | 50.4                 | 16.8               | 3255                | 30                | 0.20                | 12.5                | 109.5               | 11.1                | 342                 | 0.63                | 0.32                | 0.20                | 0.062               | 298                 |                      |

\*1: standard deviation of multiple analyses.

\*2: RSF is estimated to be 1.45 times of those in NIST 610 for Cr, Mn, Co, Ni, Cu (same as Fe), 1.00 times for Rb, and 1.19 times for Ba (same as Sr).

**Table S3. Oxygen three isotope**

| Analysis#   | Location                    | d18O<br>(±0.35) | d17O<br>(±0.39) | D17O<br>(±0.35) | Mode % |
|-------------|-----------------------------|-----------------|-----------------|-----------------|--------|
| 20131018-42 | Ol-1                        | 7.79            | 2.91            | -1.14           |        |
| 20131018-43 | Ol-2                        | 7.81            | 3.37            | -0.70           |        |
| 20131018-50 | Ol-4                        | 7.59            | 2.82            | -1.12           |        |
| 20131018-53 | Ol-5                        | 7.70            | 3.00            | -1.00           |        |
| 20131018-61 | Ol-6                        | 7.56            | 3.12            | -0.81           |        |
| 20131018-62 | Ol-7                        | 7.45            | 3.07            | -0.80           |        |
| 20131018-63 | Ol-8                        | 7.60            | 2.78            | -1.18           |        |
|             | <b>Olivine average</b>      | <b>7.64</b>     | <b>3.01</b>     | <b>-0.97</b>    | 12.5   |
|             | 2SD (n=7)                   | 0.26            | 0.40            | 0.39            |        |
|             | <b>Error of the mean</b>    | <b>0.29</b>     | <b>0.24</b>     | <b>0.17</b>     |        |
| 20131018-64 | Px-1                        | 7.31            | 2.97            | -0.83           |        |
| 20131018-65 | Px-2                        | 7.08            | 2.68            | -1.00           |        |
| 20131018-66 | Px-3                        | 7.12            | 2.78            | -0.93           |        |
| 20131018-49 | Px-11                       | 7.30            | 2.71            | -1.09           |        |
| 20131018-45 | Px-12 core                  | 7.52            | 3.22            | -0.69           |        |
| 20131018-46 | Px-12 rim                   | 7.32            | 3.29            | -0.51           |        |
| 20131018-48 | Px-18                       | 7.46            | 3.02            | -0.86           |        |
|             | <b>Pyroxene average</b>     | <b>7.30</b>     | <b>2.95</b>     | <b>-0.84</b>    | 27.5   |
|             | 2SD (n=7)                   | 0.32            | 0.49            | 0.39            |        |
|             | <b>Error of the mean</b>    | <b>0.23</b>     | <b>0.23</b>     | <b>0.17</b>     |        |
| 20131018-47 | An-1                        | 7.83            | 3.21            | -0.86           |        |
| 20131018-51 | An-4                        | 7.89            | 3.24            | -0.87           |        |
| 20131018-52 | An-4 2nd                    | 8.04            | 3.28            | -0.90           |        |
| 20131018-60 | An-7                        | 7.93            | 3.17            | -0.96           |        |
| 20131018-44 | An-2: <i>hit dark zones</i> | 8.67            | 3.91            | -0.60           |        |
|             | <b>plagioclase average</b>  | <b>7.92</b>     | <b>3.22</b>     | <b>-0.90</b>    | 57.5   |
|             | 2SD (n=4)                   | 0.17            | 0.09            | 0.09            |        |
|             | <b>Error of the mean</b>    | <b>0.43</b>     | <b>0.31</b>     | <b>0.20</b>     |        |
|             | <b>All data average</b>     | <b>7.71</b>     | <b>3.12</b>     | <b>-0.90</b>    | 97.5   |
|             | 2SD (n=18)                  | <b>0.36</b>     | <b>0.28</b>     | 0.35            |        |
|             | <b>2SE</b>                  |                 |                 | <b>0.13</b>     |        |

2SD of individual analyses are evaluated from bracketting standard analyse. n=5-6 for d18O and d17O and n=11 for D17O. "An-2" is not included for plagioclase average.

## Supplementary Material S4

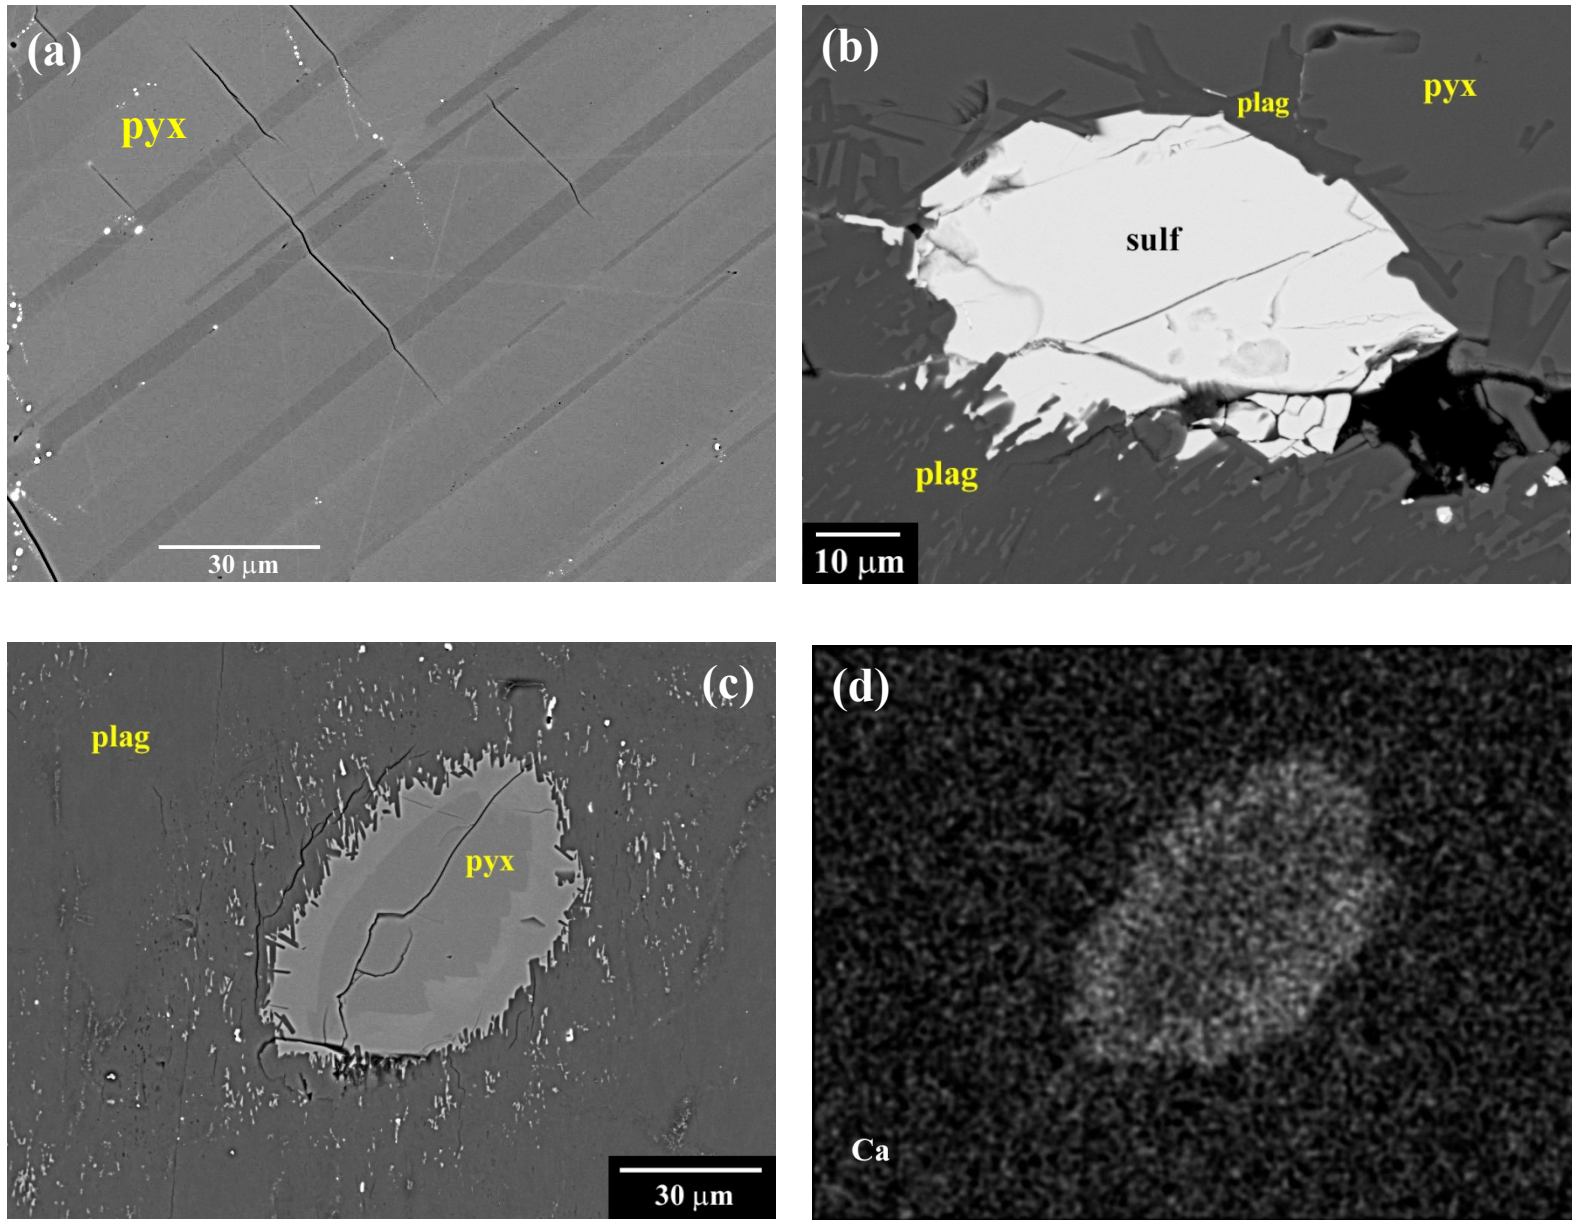

**Fig. S4.** Back-scattered electron images (BEI) of NWA 7325. (a) Polysynthetic twin lamellae in pyroxene (pyx), seen in BEI due to electron channeling. (b) Sulfide grain (sulf) along reacted grain boundary between plagioclase (pyx) and pyroxene. (c) Small grain of pyroxene showing reaction texture with surrounding plagioclase. Plagioclase protruding into the pyroxene grain as idiomorphic terminations is more sodic than the bulk of the plagioclase. (d) Ca x-ray map of the area in [c], showing that the rim of the pyroxene has higher Ca content than the core (which is similar in composition to the large pyroxene grains in NWA 7325).

## Profile 5 in plagioclase in NWA 7325

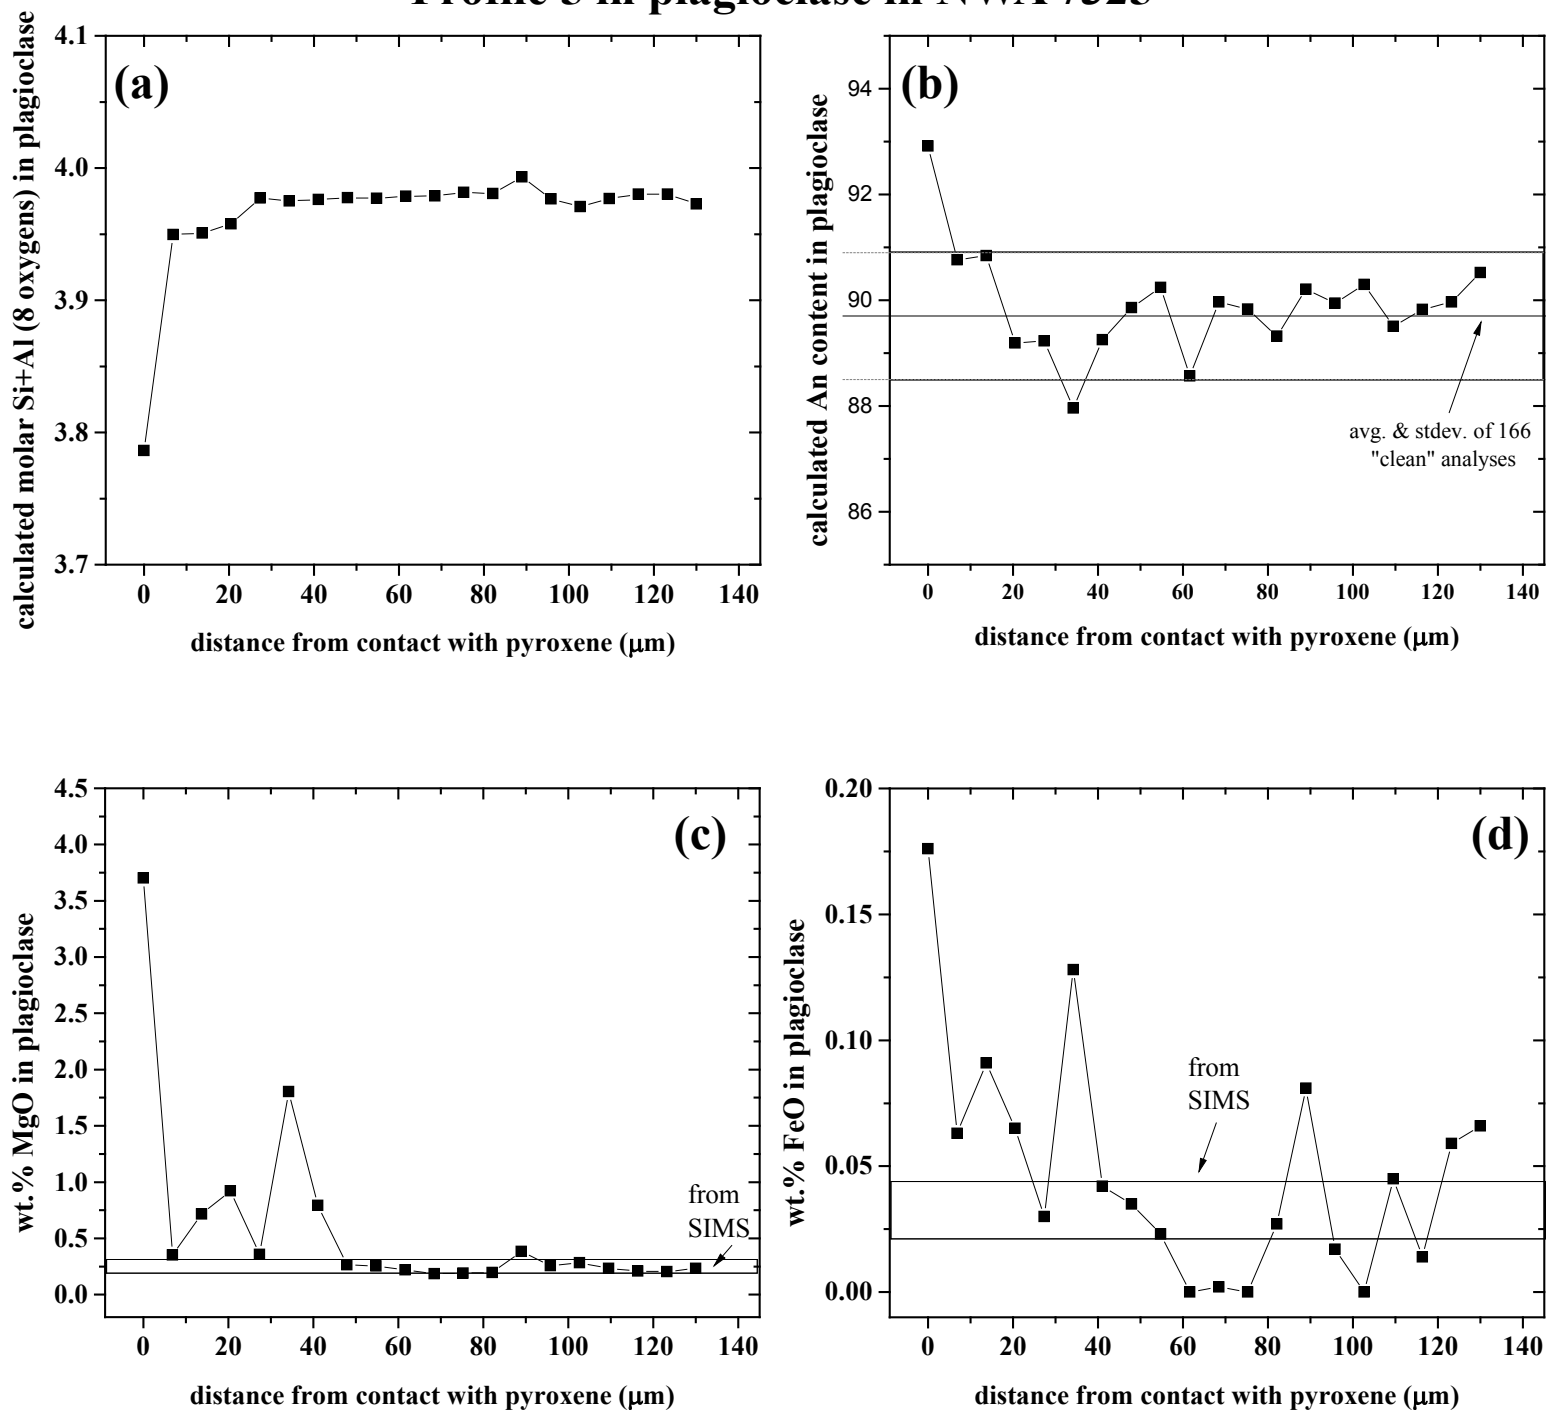

**Fig. S5.** Compositional profile in plagioclase moving away from contact with large pyroxene grain in NWA 7325. Analyses near the pyroxene have excesses of MgO, FeO and CaO (leading to artificially high An content) and deficits of Si+Al relative to the “cleaner” analyses from the interior, showing overlap with the small pyroxene inclusions in the analyses. They also sometimes show significant amounts of S due to dispersed sulfide inclusions.

# Supporting Information S6

## Supporting Information Ion imaging after trace element analysis of plagioclase in NWA 7325

**Analyses A1-2:** heterogeneity in Na, K, Mg, and Cr.

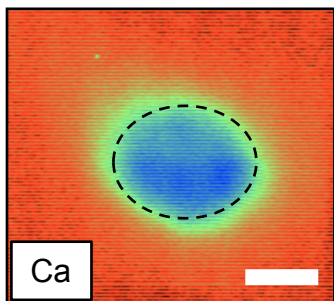

Detector: multi-channel plate.  
Field of view= 44  $\mu\text{m}$  x 40  $\mu\text{m}$   
Spot size = 20  $\mu\text{m}$  x 15  $\mu\text{m}$  (oval dashed line)  
Scale bar = 10  $\mu\text{m}$   
Image resolution ~ 2-3  $\mu\text{m}$

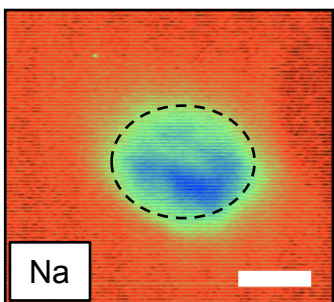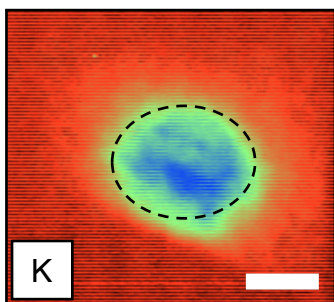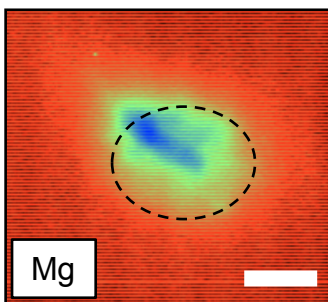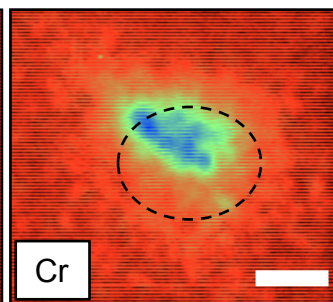

**Analyses A2-2:** heterogeneity in Na, K, Mg, and Cr.

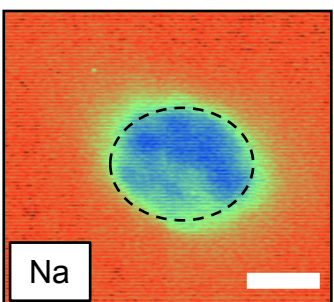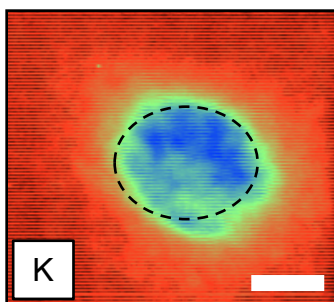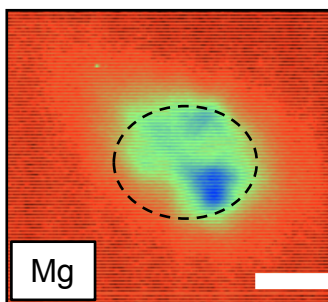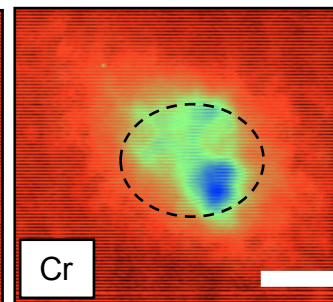

**Analyses A1-3:** homogeneous ion image.

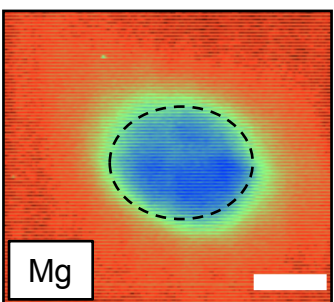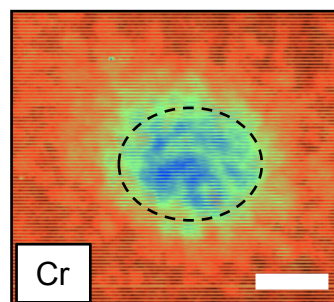

Supplement: NIHMS990424-supplement-supplements.pdf [file NIHMS990424-supplement-supplements.pdf]
